# Supplementary material
Source: MDPI journal article supplement (https://www.mdpi.com/1424-2818/13/11/564)
Supplement: s1 [file s1]

**Supplemental Table S1:** Argos Id’s and morphometric measures of captured wild Blue-throated Macaws from Barba Azul. Note Sexes were not determined.

|         | Date of Capture | Transmitter Argos ID | Wing (mm) | Tail (mm) | Culmen (mm) | Total Head (mm) | Tarsus (mm) | Body Mass (g) | Transmitter Weight (gm) | % of Body Mass |
|---------|-----------------|----------------------|-----------|-----------|-------------|-----------------|-------------|---------------|-------------------------|----------------|
| ARGL1   | 08_31_19        | 172540               | 354       | 469       | 51.7        | 53.2            | 30.7        | 700           | 31.3                    | 4.5%           |
| ARGL2   | 09_01_19        | 172140               | 331       | 435       | 46.6        | 45.5            | 31.0        | 670           | 30.9                    | 4.6%           |
| ARGL3   | 09_09_19        | 172139               | 360       | 496       | 51.4        | 48.5            | 30.9        | 840           | 32.1                    | 3.8%           |
| ARGL4   | 09_09_19        | None                 | 343       | 460       | 48.7        | 45.7            | 29.5        | 670           |                         |                |
| Average |                 |                      | 347       | 465.0     | 49.6        | 48.2            | 30.5        | 720           |                         |                |
| ± SD    |                 |                      | 12.8      | 25.2      | 2.4         | 3.6             | 0.7         | 81.2          |                         |                |

**Supplemental Figure S1:** Map of Barba Azul Nature Reserve, with tracks of 3 BTM;s and 95% Home Range Estimates for 2 BTM's (ARGL1 and ARGL3) with sufficient data for home range analyses. Nicknames of birds used within Movebank and "Animal Tracker" app are appended to codes. Created in ARCGIS Pro 2.7.

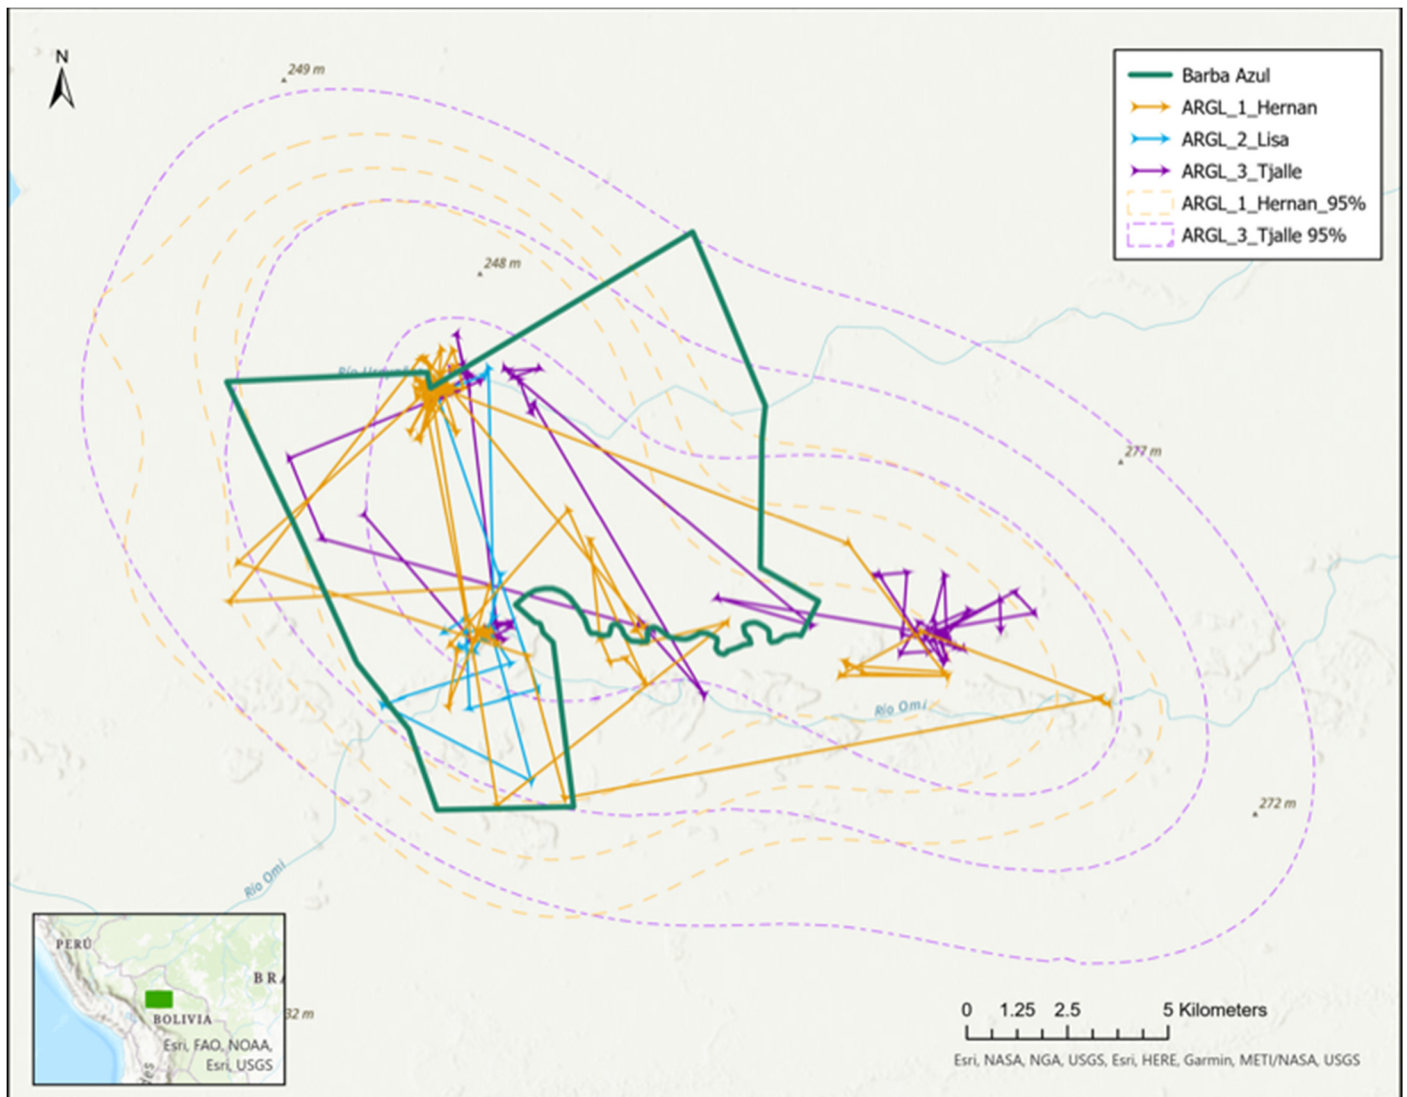

**Supplemental Figure S2:** Map of 95% Home Range Estimates for 2 BTMs (ARGL1\_Hernan on left and ARGL3\_Tjalle on right) on wet season (breeding season) sites. OU anisotropic Utilization Distribution in ARGL1\_Hernan and uncorrected KDE (IID) for ARGL3\_Tjalle, as chosen by AIC comparisons in "ctmm.select" procedure in R program "ctmm." Geographic locations redacted due to sensitivity of the data. Created in R Studio 1.4.1717.

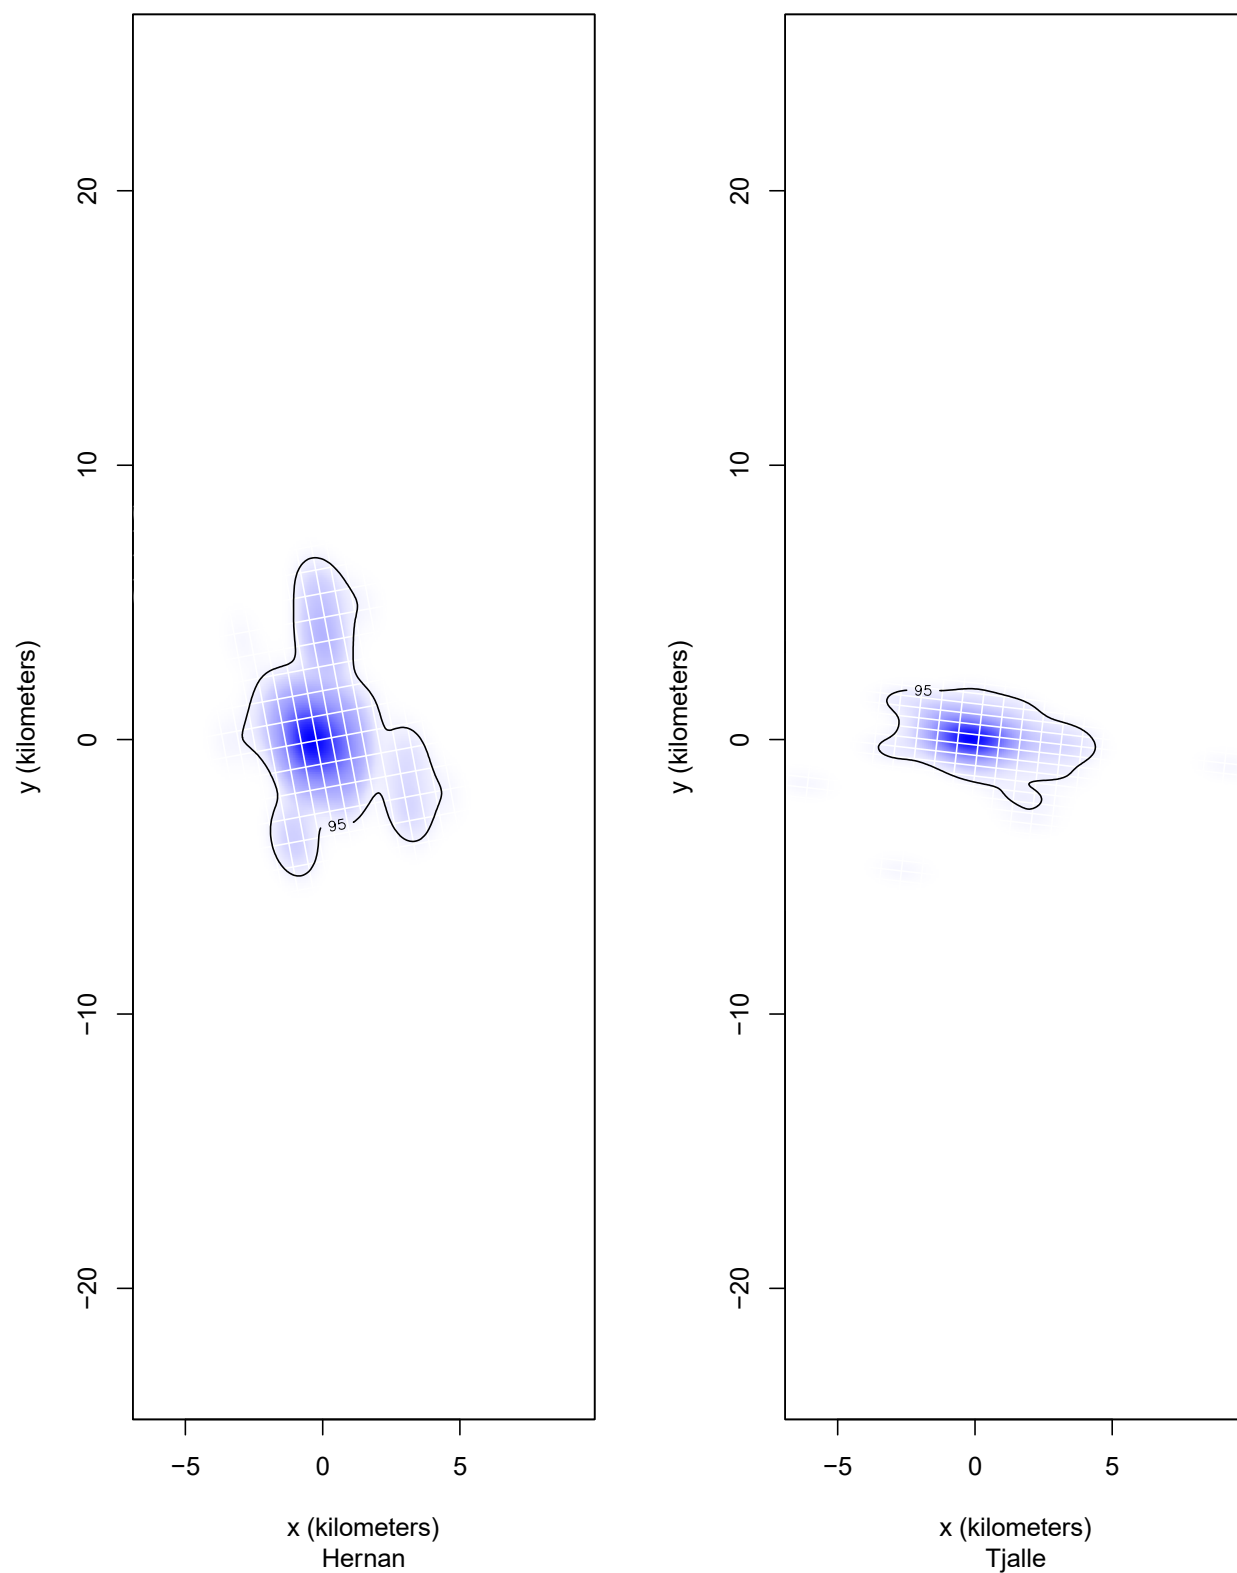

Supplemental Video S1: Video of captive BTM tagged with an MTI dummy transmitter at Loro Parque, Tenerife, Spain. Video by L.C.D. (Link to video: [https://www.dropbox.com/s/11wkth82sm7qq8z/MTI\\_captive.MOV?dl=0](https://www.dropbox.com/s/11wkth82sm7qq8z/MTI_captive.MOV?dl=0)).

Supplemental Video S2: Video of release of a wild BTM with a Geotrak transmitter. Video by L.C.D. (Link to video: <https://www.dropbox.com/s/qhbl8eyrzw4ry64/Release.MOV?dl=0>).

Supplemental Video S3: Animation of 3 BTM movements around Barba Azul, using the R program "MoveVis." Data is interpolated to provide simultaneous estimates of locations at each step in the video. Video by L.C.D. (Link to video: [https://www.dropbox.com/s/vijiajos0afmxgu/Macaws\\_BANR\\_animation.gif?dl=0](https://www.dropbox.com/s/vijiajos0afmxgu/Macaws_BANR_animation.gif?dl=0)).
